# Supplementary material
Source: Springer Nature journal article supplement (https://www.springermedizin.de/resource/supplementary/12969_2012_991_MOESM1_ESM.pdf/9589168)
Supplement: MOESM1 [file 9589168]

Additional File 1: Methotrexate in Juvenile Idiopathic Arthritis Knowledge test (MiJIAK)

**Instructions:**

The following statements are about Methotrexate and Juvenile Idiopathic Arthritis (JIA). Please mark whether you think these statements are true or false. These questions are testing the quality of the information you have been given. We therefore ask that if you do not know the answer to a question you mark "don't know" rather than trying to guess the answer or looking it up. Please answer all of the questions.

|     |                                                                                                                                                                 |      |                          |       |                          |            |                          |
|-----|-----------------------------------------------------------------------------------------------------------------------------------------------------------------|------|--------------------------|-------|--------------------------|------------|--------------------------|
| Q1  | At present there is no cure for juvenile idiopathic arthritis                                                                                                   | TRUE |                          | FALSE |                          | DON'T KNOW |                          |
| Q2  | Methotrexate is effective at relieving joint stiffness                                                                                                          | TRUE | <input type="checkbox"/> | FALSE | <input type="checkbox"/> | DON'T KNOW | <input type="checkbox"/> |
| Q3  | Taking regular folic acid (also known as folate, folicare or lexpec) reduces the chance of getting side effects from methotrexate                               | TRUE |                          | FALSE |                          | DON'T KNOW |                          |
| Q4  | Methotrexate can cause mouth ulcers                                                                                                                             | TRUE | <input type="checkbox"/> | FALSE | <input type="checkbox"/> | DON'T KNOW | <input type="checkbox"/> |
| Q5  | The low dose of methotrexate used to treat juvenile idiopathic arthritis has the same risks and side effects as the higher doses used to treat other conditions | TRUE |                          | FALSE |                          | DON'T KNOW |                          |
| Q6  | Drinking alcohol increases the chance of getting liver damage from methotrexate                                                                                 | TRUE | <input type="checkbox"/> | FALSE | <input type="checkbox"/> | DON'T KNOW | <input type="checkbox"/> |
| Q7  | If your child misses a dose of methotrexate, they can still take it the next day                                                                                | TRUE |                          | FALSE |                          | DON'T KNOW |                          |
| Q8  | Methotrexate tablets are white                                                                                                                                  | TRUE | <input type="checkbox"/> | FALSE | <input type="checkbox"/> | DON'T KNOW | <input type="checkbox"/> |
| Q9  | Methotrexate is also used to treat cancer                                                                                                                       | TRUE |                          | FALSE |                          | DON'T KNOW |                          |
| Q10 | The antibiotic Trimethoprim (also known as Trimopan) can be safely taken while on methotrexate                                                                  | TRUE | <input type="checkbox"/> | FALSE | <input type="checkbox"/> | DON'T KNOW | <input type="checkbox"/> |

|     |                                                                                                                            |      |                          |       |                          |            |                          |
|-----|----------------------------------------------------------------------------------------------------------------------------|------|--------------------------|-------|--------------------------|------------|--------------------------|
| Q11 | Most children and young people can safely take methotrexate for years                                                      | TRUE |                          | FALSE |                          | DON'T KNOW |                          |
| Q12 | Juvenile idiopathic arthritis causes joint inflammation                                                                    | TRUE | <input type="checkbox"/> | FALSE | <input type="checkbox"/> | DON'T KNOW | <input type="checkbox"/> |
| Q13 | Regular folic acid (also known as folate, folicare or lespec) should be taken by most children who are taking methotrexate | TRUE |                          | FALSE |                          | DON'T KNOW |                          |
| Q14 | The benefits of methotrexate should be noticed within a few days of starting it                                            | TRUE | <input type="checkbox"/> | FALSE | <input type="checkbox"/> | DON'T KNOW | <input type="checkbox"/> |
| Q15 | Nausea is a common side effect of methotrexate                                                                             | TRUE |                          | FALSE |                          | DON'T KNOW |                          |
| Q16 | Treatment of juvenile idiopathic arthritis with medications can prevent joint damage                                       | TRUE | <input type="checkbox"/> | FALSE | <input type="checkbox"/> | DON'T KNOW | <input type="checkbox"/> |
| Q17 | Methotrexate can cause young women to have irregular periods                                                               | TRUE |                          | FALSE |                          | DON'T KNOW |                          |
| Q18 | Taking regular folic acid (also known as folate, folicare or lespec) reduces joint pain and swelling                       | TRUE | <input type="checkbox"/> | FALSE | <input type="checkbox"/> | DON'T KNOW | <input type="checkbox"/> |
| Q19 | Methotrexate is a commonly used treatment for juvenile idiopathic arthritis                                                | TRUE |                          | FALSE |                          | DON'T KNOW |                          |
| Q20 | Treatment for juvenile idiopathic arthritis is more effective if it is started early                                       | TRUE | <input type="checkbox"/> | FALSE | <input type="checkbox"/> | DON'T KNOW | <input type="checkbox"/> |
| Q21 | Your child needs to continue having regular blood tests as long as they take methotrexate                                  | TRUE |                          | FALSE |                          | DON'T KNOW |                          |
| Q22 | Anti-inflammatory medications (for example Nurofen or Ibuprofen) should not be used while taking methotrexate              | TRUE | <input type="checkbox"/> | FALSE | <input type="checkbox"/> | DON'T KNOW | <input type="checkbox"/> |
| Q23 | If your child misses a dose of methotrexate, you should double the dose next time to make up for it                        | TRUE |                          | FALSE |                          | DON'T KNOW |                          |

|     |                                                                                                                                |      |                          |       |                          |            |                          |
|-----|--------------------------------------------------------------------------------------------------------------------------------|------|--------------------------|-------|--------------------------|------------|--------------------------|
| Q24 | Methotrexate is often combined with other medications used to treat juvenile idiopathic arthritis                              | TRUE | <input type="checkbox"/> | FALSE | <input type="checkbox"/> | DON'T KNOW | <input type="checkbox"/> |
| Q25 | Your child should not have the flu vaccine while on methotrexate                                                               | TRUE |                          | FALSE |                          | DON'T KNOW |                          |
| Q26 | Both young men and women taking methotrexate should use reliable birth control (contraception)                                 | TRUE | <input type="checkbox"/> | FALSE | <input type="checkbox"/> | DON'T KNOW | <input type="checkbox"/> |
| Q27 | Anti-inflammatory medications (for example Nurofen or Ibuprofen) can slow joint damage caused by juvenile idiopathic arthritis | TRUE |                          | FALSE |                          | DON'T KNOW |                          |
| Q28 | Methotrexate should be stopped if your child's juvenile idiopathic arthritis flares up (becomes worse)                         | TRUE | <input type="checkbox"/> | FALSE | <input type="checkbox"/> | DON'T KNOW | <input type="checkbox"/> |
| Q29 | Methotrexate can cause thinning of the hair                                                                                    | TRUE |                          | FALSE |                          | DON'T KNOW |                          |
| Q30 | All medications used to treat juvenile idiopathic arthritis can cause side effects                                             | TRUE | <input type="checkbox"/> | FALSE | <input type="checkbox"/> | DON'T KNOW | <input type="checkbox"/> |
| Q31 | Any young person who drinks alcohol should restrict their alcohol intake while taking methotrexate                             | TRUE |                          | FALSE |                          | DON'T KNOW |                          |
| Q32 | Your child should take methotrexate daily (tablets, syrup or injections)                                                       | TRUE | <input type="checkbox"/> | FALSE | <input type="checkbox"/> | DON'T KNOW | <input type="checkbox"/> |
| Q33 | Your child should keep taking methotrexate even when their joints are not painful                                              | TRUE |                          | FALSE |                          | DON'T KNOW |                          |
| Q34 | Methotrexate is effective at relieving joint swelling                                                                          | TRUE | <input type="checkbox"/> | FALSE | <input type="checkbox"/> | DON'T KNOW | <input type="checkbox"/> |
| Q35 | Treatment for newly diagnosed juvenile idiopathic arthritis often includes methotrexate                                        | TRUE |                          | FALSE |                          | DON'T KNOW |                          |
| Q36 | The chance of side effects increases when methotrexate is taken more often than prescribed                                     | TRUE | <input type="checkbox"/> | FALSE | <input type="checkbox"/> | DON'T KNOW | <input type="checkbox"/> |

|     |                                                                                     |      |                          |       |                          |            |                          |
|-----|-------------------------------------------------------------------------------------|------|--------------------------|-------|--------------------------|------------|--------------------------|
| Q37 | Your child should not have any live vaccinations while on methotrexate              | TRUE | <input type="checkbox"/> | FALSE | <input type="checkbox"/> | DON'T KNOW | <input type="checkbox"/> |
| Q38 | Blood tests are done to pick up side effects caused by methotrexate                 | TRUE | <input type="checkbox"/> | FALSE | <input type="checkbox"/> | DON'T KNOW | <input type="checkbox"/> |
| Q39 | Methotrexate treatment will be stopped once your child's arthritis is under control | TRUE | <input type="checkbox"/> | FALSE | <input type="checkbox"/> | DON'T KNOW | <input type="checkbox"/> |
| Q40 | Methotrexate should be stopped if your child develops a cold                        | TRUE | <input type="checkbox"/> | FALSE | <input type="checkbox"/> | DON'T KNOW | <input type="checkbox"/> |
| Q41 | Methotrexate tablets come in two different strengths                                | TRUE | <input type="checkbox"/> | FALSE | <input type="checkbox"/> | DON'T KNOW | <input type="checkbox"/> |
| Q42 | Methotrexate should be taken on the same day each week                              | TRUE | <input type="checkbox"/> | FALSE | <input type="checkbox"/> | DON'T KNOW | <input type="checkbox"/> |
